# Supplementary material for: Metagenomic shifts in mucus, tissue and skeleton of the coral Balanophyllia europaea living along a natural CO2 gradient
Source: Springer Nature journal article supplement (doi:10.1038/s43705-022-00152-1), 2022-08-05
Supplement: MOESM1 [file 43705_2022_152_moesm1_esm.pdf]

**Metagenomic shifts in mucus, tissue and skeleton of the coral  
*Balanophyllia europaea* living along a natural CO<sub>2</sub> gradient**

Palladino Giorgia<sup>1,2\*</sup>, Caroselli Erik<sup>2,3\*</sup>, Tavella Teresa<sup>1</sup>, D'Amico Federica<sup>1</sup>, Prada Fiorella<sup>2,3</sup>, Mancuso Arianna<sup>2,3</sup>,  
Franzellitti Silvia<sup>2,4</sup>, Rampelli Simone<sup>1</sup>, Candela Marco<sup>1,2†</sup>, Goffredo Stefano<sup>2,3†</sup>, Biagi Elena<sup>1,2</sup>

<sup>1</sup> Unit of Microbiome Science and Biotechnology, Department of Pharmacy and Biotechnology, University of Bologna, via Belmeloro 6, 40126 Bologna, Italy

<sup>2</sup> Fano Marine Center, the Inter-Institute Center for Research on Marine Biodiversity, Resources and Biotechnologies, viale Adriatico 1/N, 61032 Fano, Pesaro Urbino, Italy

<sup>3</sup> Marine Science Group, Department of Biological, Geological and Environmental Sciences, University of Bologna, via Selmi 3, 40126 Bologna, Italy

<sup>4</sup> Animal and Environmental Physiology Laboratory, Department of Biological, Geological and Environmental Sciences, University of Bologna, via Sant'Alberto 163, 48123 Ravenna, Italy

\*These authors contributed equally

†Corresponding authors: [marco.candela@unibo.it](mailto:marco.candela@unibo.it); [s.goffredo@unibo.it](mailto:s.goffredo@unibo.it)

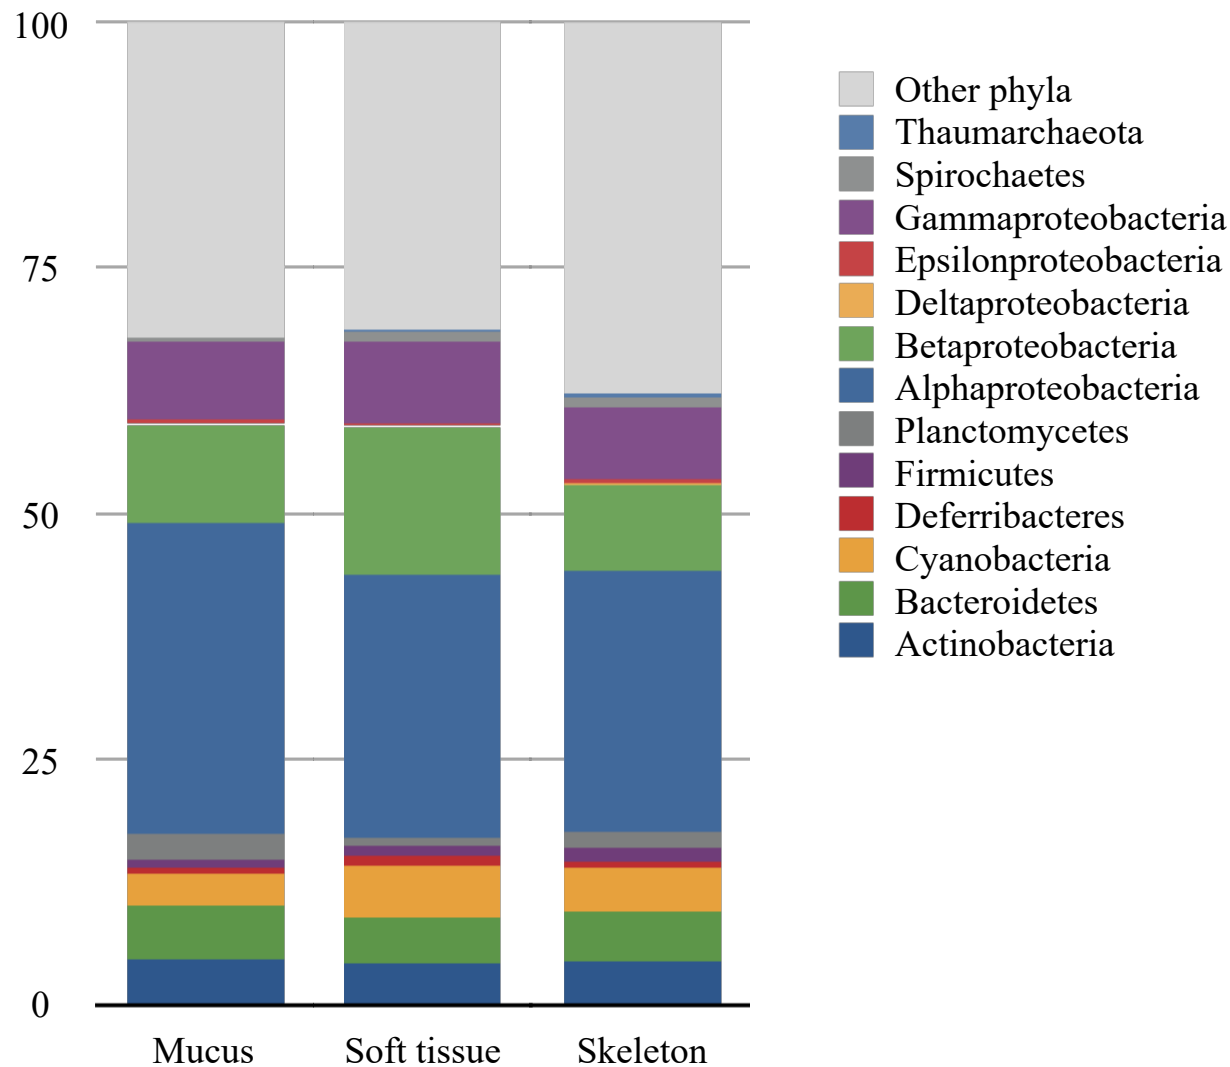

**Supplementary Figure S1 – *B. europaea* microbiomes composition at phylum level.** Bar plots of the average microbiome composition at the phylum (and class for Proteobacteria) taxonomic level in the 3 different *B. europaea* anatomic compartments (mucus, soft tissue and skeleton). Composition is expressed as relative abundance (%) calculated on the phylogenetically assigned metagenomic reads. The dominant phylum in all tissues is represented by Proteobacteria, with the highest abundance of Alphaproteobacteria (mucus, 31.5%; soft tissue, 26.6%; skeleton, 26.5%), followed by Betaproteobacteria (10%, 15.1% and 8.6%) and Gammaproteobacteria (8.0%, 8.3% and 7.5%). Bacteroidetes is also present as dominant phylum (5.5%, 4.6% and 5.1%).

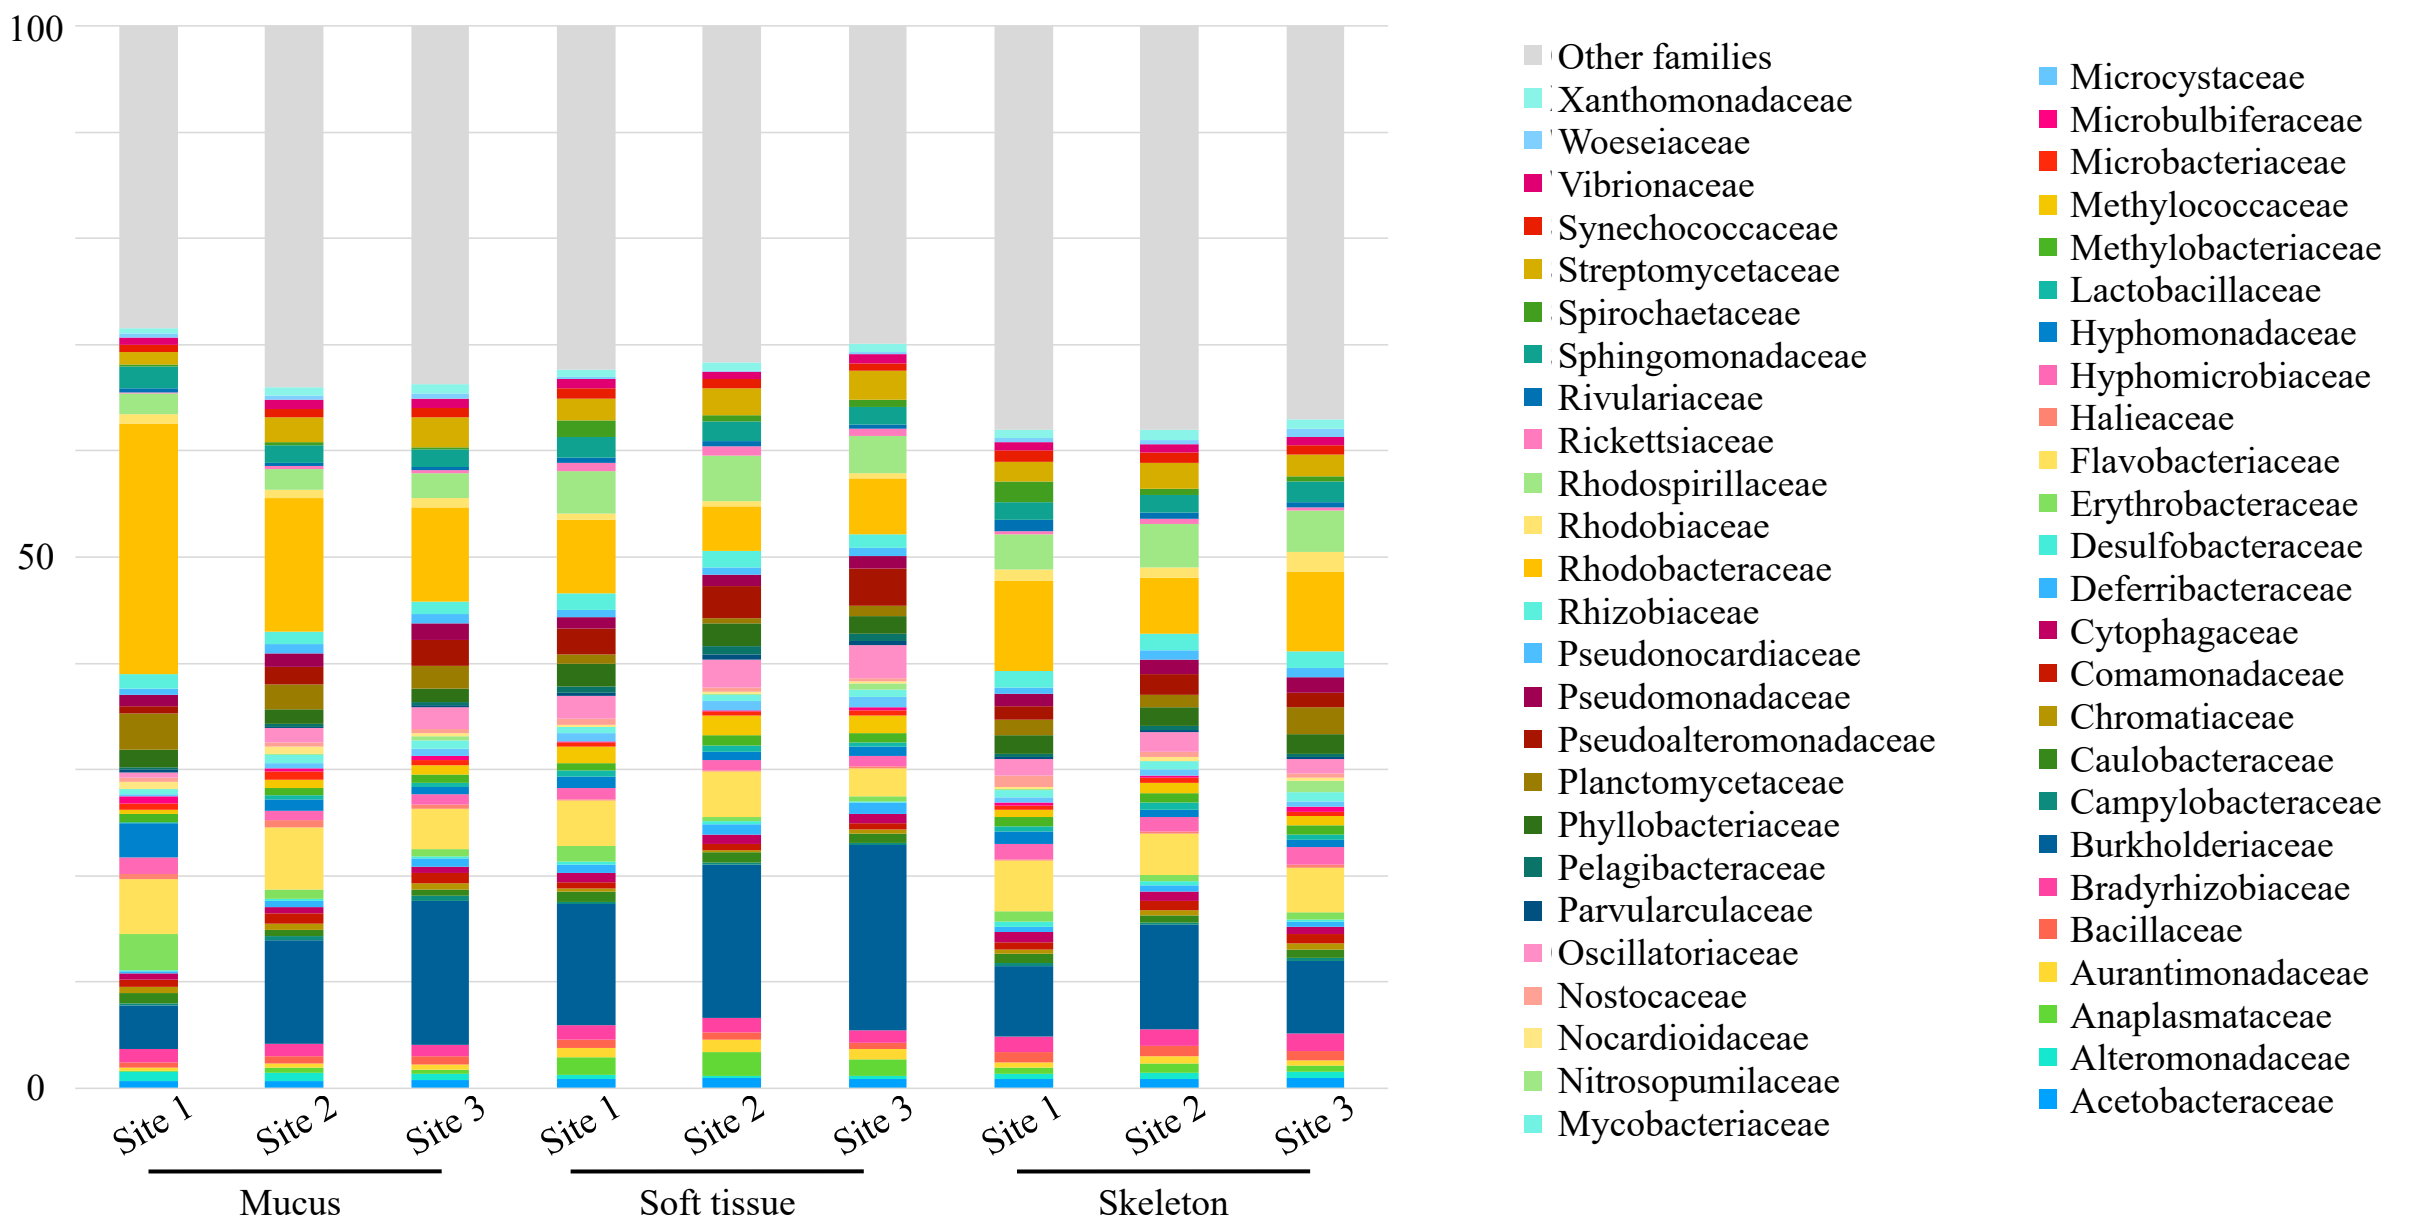

**Supplementary Figure S2 – *B. europaea* microbial composition at family level.** Bar plots of the average microbiome composition at family taxonomic level in the 3 different *B. europaea* anatomic compartments (mucus, soft tissue and skeleton) and in the 3 different acidification conditions (Site 1, Site 2 and Site 3, corresponding to control conditions, mild acidification and high acidification, respectively). Compositions is expressed as relative abundance (%) calculated on the phylogenetically assigned metagenomic reads. In mucus samples, it can be observed a trend of increasing relative abundance of the family *Burkholderiaceae* from Site 1 to Site 2 and 3 (relative abundance 4.1%, 9.8% and 13.5% respectively) and of decreasing relative abundance of the family *Rhodobacteraceae* (relative abundance 23.6%, 12.6% and 8.1%).

**Supplementary Table S1 – Taxonomic summary of *B. europaea* microbial family composition based on 16S rRNA gene data.** Table reporting the average relative abundance (r.a.) percentage of microbiome composition at family taxonomic level based on 16S rRNA gene data in the 3 different *B. europaea* anatomic compartments (mucus, soft tissue and skeleton). Avg = average, SD = standard deviation.

| Bacterial family (r.a. %)       | Mucus |      | Skeleton |      | Soft tissue |       |
|---------------------------------|-------|------|----------|------|-------------|-------|
|                                 | Avg   | SD   | Avg      | SD   | Avg         | SD    |
| Acidobacteria;Subgroup9;unc     | 0.39  | 0.93 | 0.23     | 0.60 | 0.17        | 0.33  |
| Acidimicrobiaceae               | 0.66  | 0.76 | 0.90     | 1.47 | 0.32        | 0.65  |
| Acidimicrobiales;unc            | 0.29  | 0.30 | 0.97     | 2.02 | 0.04        | 0.11  |
| Alphaproteobacteria_Inc_Sedis   | 1.56  | 1.79 | 0.51     | 0.39 | 1.22        | 0.88  |
| Alphaproteobacteria;Other       | 0.56  | 1.02 | 2.39     | 2.66 | 0.62        | 0.81  |
| Alteromonadales;Other           | 0.47  | 1.42 | 0.00     | 0.00 | 0.00        | 0.00  |
| Bacteroidetes;Other             | 0.26  | 0.73 | 0.29     | 0.34 | 0.17        | 0.30  |
| Bdellovibrionaceae              | 0.17  | 0.16 | 0.28     | 0.29 | 0.47        | 0.77  |
| Burkholderiaceae                | 0.98  | 1.87 | 0.03     | 0.05 | 6.26        | 18.79 |
| Campylobacteraceae              | 0.08  | 0.15 | 0.02     | 0.06 | 0.43        | 1.21  |
| Chlamydiales;Other              | 0.50  | 0.44 | 0.78     | 0.60 | 1.08        | 0.85  |
| Clostridiaceae1                 | 2.74  | 8.07 | 0.02     | 0.07 | 0.04        | 0.13  |
| Clostridiales;FamXII            | 0.67  | 2.00 | 0.00     | 0.00 | 0.07        | 0.20  |
| Clostridiales;FamXIII           | 0.42  | 1.25 | 0.00     | 0.00 | 0.00        | 0.00  |
| Clostridiales;Other             | 0.09  | 0.15 | 3.06     | 5.52 | 1.25        | 2.60  |
| Coriobacteriaceae               | 0.59  | 1.77 | 0.01     | 0.03 | 0.00        | 0.00  |
| Coxiellaceae                    | 0.50  | 0.96 | 0.09     | 0.14 | 0.32        | 0.50  |
| Cyanobacteria;SubsI;FamI        | 0.82  | 1.17 | 0.10     | 0.19 | 0.03        | 0.09  |
| Cyanobacteria;SubsII;FamII      | 0.15  | 0.20 | 0.60     | 1.21 | 0.13        | 0.29  |
| Cyanobacteria;SubsII;Other      | 0.00  | 0.00 | 0.66     | 1.36 | 0.45        | 1.20  |
| Cyanobacteria;SubsIII;FamI      | 2.10  | 5.71 | 2.54     | 2.53 | 0.34        | 0.58  |
| Deltaproteobacteria;Sva0485     | 0.00  | 0.00 | 0.04     | 0.13 | 0.34        | 0.98  |
| Enterobacteriaceae              | 0.74  | 1.81 | 0.06     | 0.18 | 0.79        | 1.50  |
| Erythrobacteraceae              | 1.58  | 2.20 | 0.61     | 1.18 | 0.65        | 1.10  |
| Flammeovirgaceae                | 1.36  | 0.93 | 7.48     | 5.23 | 1.69        | 1.19  |
| Flavobacteriaceae               | 4.61  | 3.62 | 5.16     | 4.23 | 14.62       | 11.98 |
| Fusobacteriaceae                | 0.20  | 0.52 | 0.15     | 0.44 | 1.16        | 3.48  |
| Gammaproteobacteria;KI89A clade | 0.11  | 0.15 | 0.12     | 0.18 | 0.34        | 0.72  |
| Gammaproteobacteria;Other       | 3.57  | 3.71 | 3.05     | 1.48 | 3.52        | 2.60  |
| Gracilibacteria;unc             | 0.47  | 0.85 | 0.01     | 0.04 | 0.14        | 0.31  |
| Haliaceae                       | 1.12  | 1.50 | 0.44     | 0.38 | 0.35        | 0.39  |
| Helicobacteraceae               | 6.22  | 9.96 | 0.10     | 0.20 | 0.56        | 0.64  |
| Hyphomicrobiaceae               | 0.50  | 0.76 | 2.88     | 2.64 | 0.43        | 0.35  |
| Hyphomonadaceae                 | 1.60  | 2.32 | 1.95     | 2.43 | 1.00        | 1.74  |
| Idiomarinaceae                  | 0.81  | 1.22 | 0.00     | 0.01 | 0.02        | 0.07  |
| Lachnospiraceae                 | 1.00  | 2.60 | 0.50     | 0.82 | 1.06        | 1.83  |
| Moraxellaceae                   | 0.88  | 1.07 | 0.00     | 0.00 | 0.00        | 0.00  |
| Myxococcales;P3OB-42            | 0.09  | 0.13 | 1.19     | 2.55 | 0.56        | 0.79  |
| Oceanospirillaceae              | 0.02  | 0.05 | 0.25     | 0.68 | 0.02        | 0.03  |

| Bacterial family (r.a. %)             | Mucus |      | Skeleton |       | Soft tissue |       |
|---------------------------------------|-------|------|----------|-------|-------------|-------|
|                                       | Avg   | SD   | Avg      | SD    | Avg         | SD    |
| Oceanospirillales;SUP05cluster        | 0.04  | 0.11 | 0.93     | 2.75  | 0.06        | 0.18  |
| Oceanospirillales;Other               | 0.28  | 0.77 | 0.34     | 0.60  | 0.78        | 1.51  |
| Parvularculaceae                      | 0.50  | 0.39 | 0.80     | 0.79  | 0.82        | 1.91  |
| Peptostreptococcaceae                 | 2.73  | 7.63 | 0.09     | 0.25  | 0.63        | 1.76  |
| Phycisphaerae;CCM11a;unc              | 0.00  | 0.00 | 0.01     | 0.04  | 0.28        | 0.85  |
| Phycisphaeraceae                      | 0.43  | 0.39 | 1.48     | 0.78  | 0.50        | 0.49  |
| Phyllobacteriaceae                    | 3.15  | 6.05 | 2.67     | 1.68  | 2.35        | 1.59  |
| Planctomycetaceae                     | 7.39  | 4.03 | 9.72     | 3.06  | 4.52        | 1.22  |
| Porphyromonadaceae                    | 0.78  | 2.34 | 0.00     | 0.00  | 0.00        | 0.00  |
| Proteobacteria;Other                  | 0.07  | 0.10 | 0.01     | 0.04  | 0.70        | 1.76  |
| Pseudoalteromonadaceae                | 0.47  | 0.85 | 0.04     | 0.09  | 1.01        | 2.28  |
| Pseudomonadaceae                      | 0.82  | 1.86 | 0.21     | 0.32  | 0.30        | 0.85  |
| Rhizobiales;Other                     | 4.03  | 6.57 | 3.22     | 2.19  | 2.85        | 3.36  |
| Rhodobacteraceae                      | 11.50 | 6.04 | 6.13     | 6.17  | 5.74        | 4.41  |
| Rhodobiaceae                          | 0.27  | 0.69 | 0.97     | 1.58  | 0.30        | 0.50  |
| Rhodospirillaceae                     | 1.48  | 1.73 | 8.58     | 8.46  | 5.18        | 4.95  |
| Rhodospirillales_Inc_Sedis            | 0.26  | 0.36 | 0.80     | 1.62  | 0.27        | 0.45  |
| Rhodospirillales;Other                | 1.30  | 2.61 | 3.49     | 6.08  | 0.87        | 0.81  |
| Rickettsiales;Other                   | 0.08  | 0.12 | 0.01     | 0.02  | 0.46        | 0.79  |
| Rikenellaceae                         | 0.26  | 0.78 | 0.00     | 0.00  | 0.00        | 0.00  |
| Ruminococcaceae                       | 0.60  | 1.15 | 0.01     | 0.02  | 0.40        | 0.97  |
| Saprosiraceae                         | 0.50  | 0.47 | 0.54     | 0.63  | 0.78        | 1.52  |
| SAR324clade(Mar_gr_B);Other           | 0.06  | 0.13 | 0.09     | 0.12  | 0.36        | 1.01  |
| SBR1093;unc                           | 0.33  | 0.44 | 0.40     | 0.62  | 0.42        | 0.76  |
| Shewanellaceae                        | 0.04  | 0.09 | 0.06     | 0.13  | 0.58        | 1.47  |
| Sphingomonadales;Other                | 0.92  | 2.72 | 0.00     | 0.00  | 0.00        | 0.00  |
| Spirochaetaceae                       | 0.02  | 0.06 | 4.94     | 11.07 | 5.78        | 12.24 |
| Spiroplasmataceae                     | 0.00  | 0.00 | 0.00     | 0.00  | 5.23        | 14.28 |
| Streptomycetaceae                     | 0.08  | 0.20 | 0.01     | 0.03  | 0.65        | 1.07  |
| Synergistaceae                        | 0.25  | 0.74 | 0.00     | 0.00  | 0.00        | 0.00  |
| Syntrophaceae                         | 0.00  | 0.00 | 0.00     | 0.01  | 0.43        | 0.94  |
| Thiotrichaceae                        | 1.46  | 2.53 | 0.36     | 0.70  | 0.44        | 0.74  |
| TM6(Dependentiae);unc                 | 0.02  | 0.06 | 0.44     | 1.13  | 0.35        | 0.81  |
| Verrucomicrobiales;DEV007             | 0.94  | 0.52 | 1.00     | 0.71  | 0.26        | 0.33  |
| Verrucomicrobiaceae                   | 2.13  | 1.80 | 0.62     | 0.49  | 0.33        | 0.37  |
| Verrucomicrobia;Other                 | 0.09  | 0.17 | 0.42     | 0.50  | 0.33        | 0.81  |
| Vibrionaceae                          | 0.49  | 0.76 | 0.18     | 0.30  | 2.77        | 5.16  |
| Xanthomonadales;JTB255_mar_benthic_gr | 1.42  | 1.07 | 2.63     | 0.99  | 1.21        | 1.05  |
| Other families                        | 15.93 | 6.67 | 11.29    | 4.57  | 11.39       | 5.01  |

**Supplementary Table S2 - Variations in the abundance of cyanophycin synthetase (CphA) gene (K03802) in the metagenomes of all coral compartments in individuals collected at different acidification sites.** The values of relative abundance (r.a.) are calculated on the total number of reads assigned to KOs (i.e., number of reads assigned to K03802 divided by the sum of all reads in a given sample).

|                  |              | Compartment | K03802 (r.a. %) |                             |              | Compartment | K03802 (r.a. %) |                             |              | Compartment | K03802 (r.a. %) |
|------------------|--------------|-------------|-----------------|-----------------------------|--------------|-------------|-----------------|-----------------------------|--------------|-------------|-----------------|
| Site 1 – Control | Individual 1 | Mucus       | 0.0058          | Site 2 – Mild acidification | Individual 1 | Mucus       | 0.0192          | Site 3 – High acidification | Individual 1 | Mucus       | 0.0092          |
|                  |              | Soft tissue | 0.0248          |                             |              | Soft tissue | 0.0017          |                             |              | Soft tissue | 0.0075          |
|                  |              | Skeleton    | 0.0292          |                             |              | Skeleton    | 0               |                             |              | Skeleton    | 0.0298          |
|                  | Individual 2 | Mucus       | 0.0013          |                             | Individual 2 | Mucus       | 0.0112          |                             | Individual 2 | Mucus       | 0.0091          |
|                  |              | Soft tissue | 0.0107          |                             |              | Soft tissue | 0               |                             |              | Soft tissue | 0.0019          |
|                  |              | Skeleton    | 0.0153          |                             |              | Skeleton    | 0.0261          |                             |              | Skeleton    | 0.0067          |
|                  | Individual 3 | Mucus       | 0.0447          |                             | Individual 3 | Mucus       | 0.0017          |                             | Individual 3 | Mucus       | 0.026           |
|                  |              | Soft tissue | 0               |                             |              | Soft tissue | 0.003           |                             |              | Soft tissue | 0.0046          |
|                  |              | Skeleton    | 0.0126          |                             |              | Skeleton    | 0.0587          |                             |              | Skeleton    | 0.0124          |

**Supplementary Table S3 - Variations in the abundance of genes associated to the Nif (nitrogen fixation) regulon in metagenomes of all coral compartments in individuals collected at different acidification sites.** The values of relative abundance (r.a.) are calculated on the total number of reads assigned to KOs (i.e., number of reads assigned to each Nif-associated KO divided by the sum of all reads in a given sample). The correspondence between KO numbers and genes is the following: K02584 - Nif-specific regulatory protein; K02585 - Nitrogen fixation protein NifB; K02586 - Nitrogenase molybdenum-iron protein alpha chain; K02587 - Nitrogenase molybdenum-cofactor synthesis protein NifE; K02588 - Nitrogenase iron protein NifH; K02591 - Nitrogenase molybdenum-iron protein beta chain; K02592 - Nitrogenase molybdenum-iron protein NifN; K02594 - Homocitrate synthase NifV; K04488 - Nitrogen fixation protein NifU and related proteins.

|                             |              | Compartment | K02584  | K02585  | K02586  | K02587  | K02588  | K02591  | K02592  | K02594  | K04488  |
|-----------------------------|--------------|-------------|---------|---------|---------|---------|---------|---------|---------|---------|---------|
| Site 1 – Control            | Individual 1 | Mucus       | 0.0019% | 0.0011% | 0.0036% | 0.0038% | 0.0011% | 0.0036% | 0.0019% | 0.0016% | 0.0011% |
|                             |              | Soft tissue | 0.0215% | 0.0148% | 0.0101% | 0.0228% | 0.0020% | 0%      | 0.0215% | 0%      | 0.0040% |
|                             |              | Skeleton    | 0.0438% | 0.0310% | 0.0082% | 0.0018% | 0.0018% | 0%      | 0.0100% | 0%      | 0.0091% |
|                             | Individual 2 | Mucus       | 0.0057% | 0.6320% | 0.0018% | 0.0037% | 0.0024% | 0.0024% | 0.0019% | 0.0067% | 0%      |
|                             |              | Soft tissue | 0.0107% | 0.0164% | 0.0100% | 0.0064% | 0.0014% | 0.0136% | 0.0157% | 0.0050% | 0.0050% |
|                             |              | Skeleton    | 0%      | 0%      | 0%      | 0%      | 0%      | 0%      | 0%      | 0%      | 0%      |
|                             | Individual 3 | Mucus       | 0.0147% | 0.0018% | 0.0159% | 0.0196% | 0.0184% | 0.0257% | 0.0037% | 0.0159% | 0.0098% |
|                             |              | Soft tissue | 0%      | 0.0148% | 0%      | 0.0485% | 0%      | 0.0138% | 0%      | 0%      | 0%      |
|                             |              | Skeleton    | 0.0396% | 0%      | 0.0108% | 0.0126% | 0.0459% | 0.0027% | 0%      | 0%      | 0%      |
| Site 2 – Mild acidification | Individual 1 | Mucus       | 0.0322% | 0.0397% | 0.0185% | 0.0082% | 0.0034% | 0.0041% | 0.0110% | 0.0151% | 0.0171% |
|                             |              | Soft tissue | 0.0017% | 0.0103% | 0.0017% | 0.0361% | 0%      | 0.0456% | 0.0103% | 0.0112% | 0.0103% |
|                             |              | Skeleton    | 0.0589% | 0.0115% | 0.0390% | 0%      | 0.0115% | 0.0269% | 0.0115% | 0%      | 0%      |
|                             | Individual 2 | Mucus       | 0.0284% | 0.0022% | 0.0203% | 0.0081% | 0%      | 0.0184% | 0.0066% | 0.0203% | 0.0137% |
|                             |              | Soft tissue | 0.0469% | 0%      | 0%      | 0.0517% | 0.0065% | 0.0065% | 0.0129% | 0%      | 0.0016% |
|                             |              | Skeleton    | 0%      | 0.0095% | 0.0165% | 0%      | 0.0046% | 0%      | 0%      | 0.0095% | 0.0211% |
|                             | Individual 3 | Mucus       | 0%      | 0%      | 0%      | 0%      | 0.0017% | 0.0017% | 0%      | 0.0017% | 0.0083% |
|                             |              | Soft tissue | 0.0161% | 0.0030% | 0%      | 0.0030% | 0%      | 0.0030% | 0.0030% | 0%      | 0.0131% |
|                             |              | Skeleton    | 0%      | 0.0132% | 0.0010% | 0.0010% | 0%      | 0.0122% | 0.0243% | 0.0435% | 0.0851% |
| Site 3 – High acidification | Individual 1 | Mucus       | 0.0031% | 0.0010% | 0.0212% | 0.0212% | 0.0010% | 0.0031% | 0.0041% | 0.0092% | 0.0256% |
|                             |              | Soft tissue | 0.0115% | 0.0020% | 0%      | 0.0075% | 0.0040% | 0.0095% | 0%      | 0.0075% | 0.0055% |
|                             |              | Skeleton    | 0.0088% | 0.0026% | 0%      | 0%      | 0%      | 0.0175% | 0.0079% | 0.0070% | 0.0079% |
|                             | Individual 2 | Mucus       | 0.0155% | 0.0155% | 0.0255% | 0.0091% | 0.0027% | 0.0255% | 0.0027% | 0.0428% | 0%      |
|                             |              | Soft tissue | 0.0019% | 0%      | 0.0055% | 0%      | 0%      | 0.0055% | 0.0019% | 0%      | 0%      |
|                             |              | Skeleton    | 0.0208% | 0.0208% | 0%      | 0%      | 0%      | 0.0208% | 0%      | 0%      | 0%      |
|                             | Individual 3 | Mucus       | 0.0318% | 0.0034% | 0.0034% | 0%      | 0.0134% | 0.0042% | 0.0151% | 0.0017% | 0.0184% |
|                             |              | Soft tissue | 0.0158% | 0.0164% | 0.0053% | 0.0184% | 0.0066% | 0.0099% | 0.0197% | 0.0092% | 0.0132% |
|                             |              | Skeleton    | 0.0770% | 0.0124% | 0%      | 0%      | 0%      | 0.0028% | 0.0289% | 0.0422% | 0.0298% |
